# Supplementary material for: Significant secondary formation of nitrogenous organic aerosols in an urban atmosphere revealed by bihourly measurements of bulk organic nitrogen and comprehensive molecular markers
Source: Copernicus journal article supplement (doi:10.5194/acp-25-9061-2025), 2025-08-19
Supplement: Supplementary file 1 [file acp-25-9061-2025-supplement.pdf]

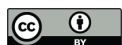

*Supplement of*

**Significant secondary formation of nitrogenous organic aerosols in an urban atmosphere revealed by bihourly measurements of bulk organic nitrogen and comprehensive molecular markers**

**Xu Yu et al.**

*Correspondence to:* Jian Zhen Yu ([jian.yu@ust.hk](mailto:jian.yu@ust.hk))

The copyright of individual parts of the supplement might differ from the article licence.

### **Text S1. Source apportionment analysis by PMF receptor model**

In this study, the sources of aerosol organic nitrogen (ON) and organic carbon (OC) were quantitatively resolved using the model of positive matrix factorization (PMF) 5.0. ON, organic/elemental carbon (OC/EC), water-soluble ions, metals, selected trace gases such as ozone ( $O_3$ ) and nitrogen oxides ( $NO_x$ ), as well as an array of organic markers including primarily emitted species and secondary organic aerosol (SOA) tracers (Table S1) served as the inputs of PMF model. The input uncertainty for each species in this study was calculated as  $(\text{concentration} \times \text{error fraction} + 1/3 \times \text{MDL})$ , where MDL is the method detection limit (Wang et al., 2018). For concentrations below MDL, the uncertainty was set as  $5/6 \times \text{MDL}$ . The error fraction was set as 0.12 for ON, OC, EC, major ions,  $NO_x$  and  $O_3$ , and 0.15 for elements and organic tracers (Wang et al., 2015). Given the comprehensive list of source tracers as inputs, PMF model runs were conducted with factors ranging from 8 to 20 factors to determine the optimal number of factors. As shown in Figure S2, the  $Q/Q_{\text{exp}}$  values decreased significantly when factor number increased from 8 to 18. We found that the 18-factor solution produced distinct factors that represent specific primary emissions and secondary formation sources. There were one or more ambiguous factors when the factor number was less than 18. In addition, through Bootstrap and Displacement error estimations, we confirmed that all resolved factors in the 18-factor solution exhibited >93% mapping and no swaps. There were no strong correlations ( $R \geq 0.7$ ) between the resolved factors, as shown in Table S2, indicating that overall the 18 factors were independent of each other and represented 18 distinct sources. Consequently, the 18-factor solution was selected to do subsequent analysis. Figure S3 displays the profiles of the 18 resolved factors while Figure S4 shows the time series and diel variation patterns of each factor contribution, respectively. Figure S5 presents comparisons of modelled and observed ON and OC concentrations. The source compositions of OC resolved from PMF analysis are shown in Figure S6 while those of ON is presented in the main text (Figure 2). Numerical results of source contributions to ON and OC are presented in Table S3.

**Table S1.** List of lumped or individual organic species as PMF inputs.

| Abbreviation   | Lumped species                                                                                                                        | Potential sources                                                                                         |
|----------------|---------------------------------------------------------------------------------------------------------------------------------------|-----------------------------------------------------------------------------------------------------------|
| sFAs           | C14-C20 saturated fatty acids                                                                                                         | Cooking                                                                                                   |
| usFAs          | Oleic, Palmitoleic, Linoleic acid                                                                                                     | Cooking                                                                                                   |
| Galactosan     | Galactosan                                                                                                                            | Biomass burning                                                                                           |
| Mannosan       | Mannosan                                                                                                                              | Biomass burning                                                                                           |
| Levogluconan   | Levogluconan                                                                                                                          | Biomass burning                                                                                           |
| Hopanes        | 22,29,30-trisnorhopane, $\alpha\beta$ -norhopane, $\alpha\beta$ -hopane, $\alpha\beta$ -22S-homohopane, $\alpha\beta$ -22R-homohopane | Vehicle emissions                                                                                         |
| PAH252         | Benzo[b]fluoranthene, Benzo[k]fluoranthene, Benzo[a]fluoranthene Benzo[e]pyrene, Benzo[a]pyrene                                       | Combustion sources                                                                                        |
| PAH276         | Indeno[1,2,3-cd]pyrene, Benzo[ghi]perylene                                                                                            | Combustion sources                                                                                        |
| Odd Alks       | C25, C27, C29, C31 n-alkanes                                                                                                          | Vegetative detritus, fossil fuel uses                                                                     |
| Even Alks      | C26, C28, C30, C32 n-alkanes                                                                                                          | Fossil fuel uses                                                                                          |
| DHOPA          | 2,3-dihydroxy-4-oxopentanoic acid                                                                                                     | Oxidation of mono-aromatics                                                                               |
| PhtA           | Phthalic acid                                                                                                                         | Oxidation of naphthalene and derivatives                                                                  |
| Nitrophenol    | 4-Nitrophenol                                                                                                                         | Combustion sources (e.g. biomass burning), oxidation of aromatics in the presence of NO <sub>x</sub>      |
| Nitrocatechols | 4-nitrocatechol, 3-Methyl-5-Nitrocatechol, 4-Methyl-5-Nitrocatechol                                                                   | Combustion sources (e.g. biomass burning), oxidation of aromatics in the presence of NO <sub>x</sub>      |
| C3-5 DCAs      | Malonic, Succinic, Glutaric acid                                                                                                      | Oxidation products of VOCs                                                                                |
| C6-8 DCAs      | Adipic, Pimelic, Suberic acid                                                                                                         | Primary emissions from anthropogenic sources (e.g. industrial emissions), oxidation of aromatic compounds |
| hDCAs          | Glyceric acid, 2-hydroxyglutaric, 3-hydroxyglutaric, 2-hydroxyadipic, 3-hydroxyadipic, hydroxypimelic acid                            | Oxidation products of VOCs and their parent DCAs                                                          |
| AzelaicA       | Azelaic acid                                                                                                                          | Oxidation products of fatty acids                                                                         |
| 9-OxononanoicA | 9-Oxononanoic acid                                                                                                                    | Oxidation products of fatty acids                                                                         |
| NonanoicA      | Nonanoic acid                                                                                                                         | Oxidation products of fatty acids                                                                         |
| Iso_T          | 2-methylglyceric acid, 2-methylthreitol, 2-methylerythritol, cisMTB1, MTB2, transMTB3                                                 | Oxidation products of isoprene                                                                            |
| aPin_T         | Pinic acid, 3-MBTCA, 3-hydroxy-4-dimethylglutaric, 3-isopropylglutaric acid                                                           | Oxidation products of $\alpha$ -pinene                                                                    |
| $\beta$ Cary_T | $\beta$ _caryophyllinic_acid                                                                                                          | Oxidation products of $\beta$ -caryophyllene                                                              |

**Table S2.** Correlation (R) matrix between the PMF-resolved factors.

|                                      | $\beta$ -caryophyllene SOA formation | Nitrocatechol formation | Phthalic acid formation | Nitrophenol formation | Vehicle emission | Dicarboxylic acid formation | Cooking emission | Residue oil combustion | Photochemical formation | Sea salt emission | Biomass burning | Coal combustion | Industrial emission | Nitrate formation | Sulfate formation | Soil dust | Isoprene&a-pinene SOA formation | Oxygenated cooking OA |
|--------------------------------------|--------------------------------------|-------------------------|-------------------------|-----------------------|------------------|-----------------------------|------------------|------------------------|-------------------------|-------------------|-----------------|-----------------|---------------------|-------------------|-------------------|-----------|---------------------------------|-----------------------|
| $\beta$ -caryophyllene SOA formation | 1.00                                 |                         |                         |                       |                  |                             |                  |                        |                         |                   |                 |                 |                     |                   |                   |           |                                 |                       |
| Nitrocatechol formation              | 0.29                                 | 1.00                    |                         |                       |                  |                             |                  |                        |                         |                   |                 |                 |                     |                   |                   |           |                                 |                       |
| Phthalic acid formation              | 0.24                                 | 0.30                    | 1.00                    |                       |                  |                             |                  |                        |                         |                   |                 |                 |                     |                   |                   |           |                                 |                       |
| Nitrophenol formation                | 0.07                                 | 0.65                    | 0.21                    | 1.00                  |                  |                             |                  |                        |                         |                   |                 |                 |                     |                   |                   |           |                                 |                       |
| Vehicle emission                     | 0.43                                 | 0.58                    | 0.12                    | 0.47                  | 1.00             |                             |                  |                        |                         |                   |                 |                 |                     |                   |                   |           |                                 |                       |
| Dicarboxylic acid formation          | 0.37                                 | -0.10                   | 0.23                    | -0.22                 | -0.08            | 1.00                        |                  |                        |                         |                   |                 |                 |                     |                   |                   |           |                                 |                       |
| Cooking emission                     | 0.27                                 | 0.43                    | 0.16                    | 0.28                  | 0.59             | -0.08                       | 1.00             |                        |                         |                   |                 |                 |                     |                   |                   |           |                                 |                       |
| Residue oil combustion               | 0.26                                 | 0.20                    | 0.01                    | 0.23                  | 0.32             | 0.26                        | 0.01             | 1.00                   |                         |                   |                 |                 |                     |                   |                   |           |                                 |                       |
| Photochemical formation              | -0.17                                | -0.41                   | -0.06                   | -0.45                 | -0.63            | 0.21                        | -0.37            | -0.37                  | 1.00                    |                   |                 |                 |                     |                   |                   |           |                                 |                       |
| Sea salt emission                    | -0.18                                | 0.12                    | -0.08                   | 0.32                  | 0.07             | -0.26                       | 0.06             | -0.06                  | -0.14                   | 1.00              |                 |                 |                     |                   |                   |           |                                 |                       |
| Biomass burning                      | 0.35                                 | 0.20                    | 0.23                    | 0.03                  | 0.23             | 0.26                        | 0.06             | 0.13                   | -0.40                   | -0.13             | 1.00            |                 |                     |                   |                   |           |                                 |                       |
| Coal combustion                      | 0.22                                 | 0.54                    | 0.14                    | 0.50                  | 0.42             | -0.01                       | 0.14             | 0.30                   | -0.43                   | 0.05              | 0.37            | 1.00            |                     |                   |                   |           |                                 |                       |
| Industrial emission                  | 0.29                                 | 0.43                    | 0.12                    | 0.34                  | 0.56             | 0.03                        | 0.33             | 0.24                   | -0.21                   | 0.13              | 0.00            | 0.40            | 1.00                |                   |                   |           |                                 |                       |
| Nitrate formation                    | 0.32                                 | 0.48                    | 0.42                    | 0.32                  | 0.37             | 0.15                        | 0.23             | 0.21                   | -0.22                   | 0.05              | 0.23            | 0.44            | 0.33                | 1.00              |                   |           |                                 |                       |
| Sulfate formation                    | -0.19                                | 0.03                    | 0.19                    | 0.18                  | -0.16            | 0.04                        | -0.16            | -0.07                  | 0.07                    | 0.06              | -0.02           | 0.17            | -0.02               | 0.41              | 1.00              |           |                                 |                       |
| Soil dust                            | 0.21                                 | 0.26                    | -0.08                   | -0.02                 | 0.39             | -0.05                       | 0.28             | -0.01                  | 0.03                    | -0.16             | -0.07           | 0.10            | 0.42                | 0.18              | -0.10             | 1.00      |                                 |                       |
| Isoprene&a-pinene SOA formation      | 0.46                                 | 0.10                    | 0.54                    | 0.00                  | 0.06             | 0.69                        | 0.06             | 0.25                   | 0.00                    | -0.09             | 0.34            | 0.08            | 0.05                | 0.31              | 0.07              | -0.16     | 1.00                            |                       |
| Oxygenated cooking OA                | 0.24                                 | 0.14                    | 0.32                    | 0.06                  | 0.23             | 0.07                        | 0.29             | 0.06                   | -0.25                   | -0.14             | 0.23            | -0.04           | 0.01                | 0.21              | -0.25             | 0.21      | 0.24                            | 1.00                  |

**Table S3.** Numerical results of source contributions to ON and OC based on the 18-factor PMF solution. Both mass contributions and percentage contributions (avg $\pm$ SD) from the sources are provided.

| Sources                              | ON                                    |                   | OC                                    |                   |
|--------------------------------------|---------------------------------------|-------------------|---------------------------------------|-------------------|
|                                      | Mass                                  | Percent           | Mass                                  | Percent           |
|                                      | contribution<br>$\mu\text{gN m}^{-3}$ | contribution<br>% | contribution<br>$\mu\text{gC m}^{-3}$ | contribution<br>% |
| Industrial emission                  | 0.03 $\pm$ 0.03                       | 4 $\pm$ 3         | 0.05 $\pm$ 0.04                       | 1 $\pm$ 1         |
| Coal combustion                      | 0.17 $\pm$ 0.15                       | 21 $\pm$ 13       | 1.08 $\pm$ 0.96                       | 19 $\pm$ 12       |
| Biomass burning                      | /                                     | /                 | 0.25 $\pm$ 0.19                       | 4 $\pm$ 3         |
| Vehicle emission                     | 0.16 $\pm$ 0.18                       | 21 $\pm$ 12       | 1.33 $\pm$ 1.47                       | 23 $\pm$ 13       |
| Residue oil combustion               | /                                     | /                 | 0.04 $\pm$ 0.04                       | 1 $\pm$ 1         |
| Cooking emission                     | 0.02 $\pm$ 0.03                       | 2 $\pm$ 3         | 0.65 $\pm$ 1.19                       | 11 $\pm$ 10       |
| Sea salt                             | /                                     | /                 | /                                     | /                 |
| Soil dust                            | 0.04 $\pm$ 0.03                       | 5 $\pm$ 3         | 0.10 $\pm$ 0.07                       | 2 $\pm$ 1         |
| Oxygenated cooking OA                | 0.05 $\pm$ 0.05                       | 7 $\pm$ 6         | 0.37 $\pm$ 0.36                       | 6 $\pm$ 6         |
| Nitrocatechol formation              | 0.06 $\pm$ 0.07                       | 7 $\pm$ 5         | 0.48 $\pm$ 0.54                       | 8 $\pm$ 6         |
| Nitrophenol formation                | 0.001 $\pm$ 0.002                     | 0.2 $\pm$ 0.3     | 0.01 $\pm$ 0.02                       | 0.2 $\pm$ 0.3     |
| Nitrate formation processes          | 0.11 $\pm$ 0.09                       | 14 $\pm$ 9        | 0.29 $\pm$ 0.23                       | 5 $\pm$ 4         |
| Sulfate formation processes          | /                                     | /                 | 0.12 $\pm$ 0.11                       | 2 $\pm$ 3         |
| Photochemical foramtion              | 0.08 $\pm$ 0.07                       | 10 $\pm$ 14       | 0.50 $\pm$ 0.41                       | 9 $\pm$ 13        |
| Phthalic acid formation              | /                                     | /                 | 0.002 $\pm$ 0.002                     | 0.04 $\pm$ 0.05   |
| Dicarboxylic acid formation          | 0.07 $\pm$ 0.08                       | 8 $\pm$ 10        | 0.26 $\pm$ 0.31                       | 4 $\pm$ 5         |
| Isoprene&a-pinene SOA formation      | /                                     | /                 | 0.19 $\pm$ 0.23                       | 3 $\pm$ 4         |
| $\beta$ -caryophyllene SOA formation | 0.01 $\pm$ 0.01                       | 1 $\pm$ 1         | 0.08 $\pm$ 0.07                       | 1 $\pm$ 1         |

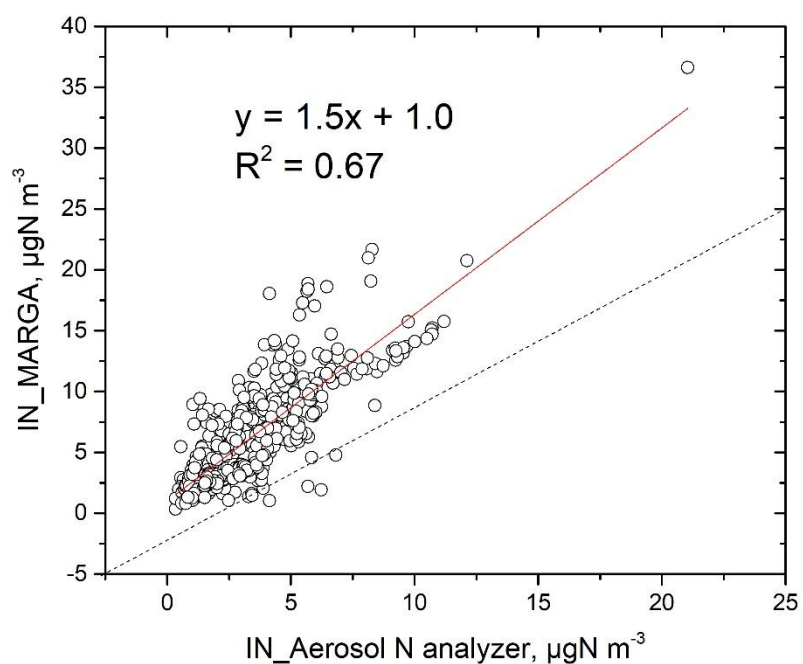

**Figure S1.** The comparison of aerosol IN concentrations determined by the new method and Monitor for AeRosols and GAses (MARGA) system. The gap between the two measurements was attributed to the differences in sampling, measurement approach, and calibrations of the two methods.

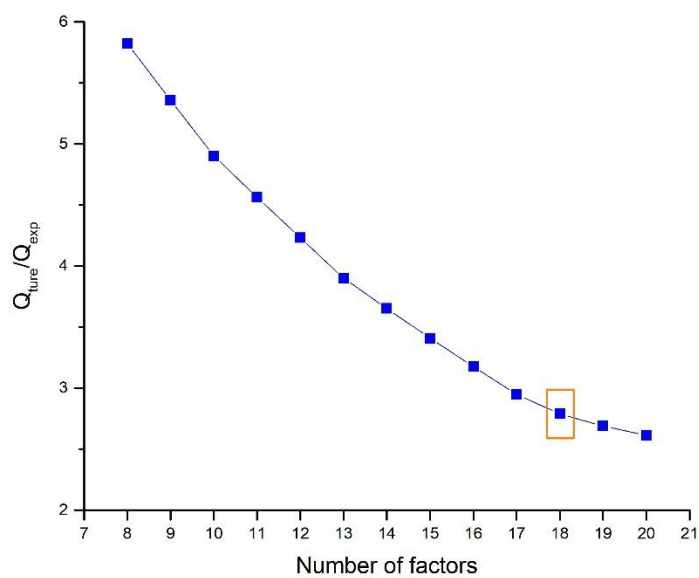

**Figure S2.** Variation of  $Q/Q_{\text{exp}}$  with the increasing of factor numbers in PMF analysis. 18-factor solution was selected as indicated by a yellow box.

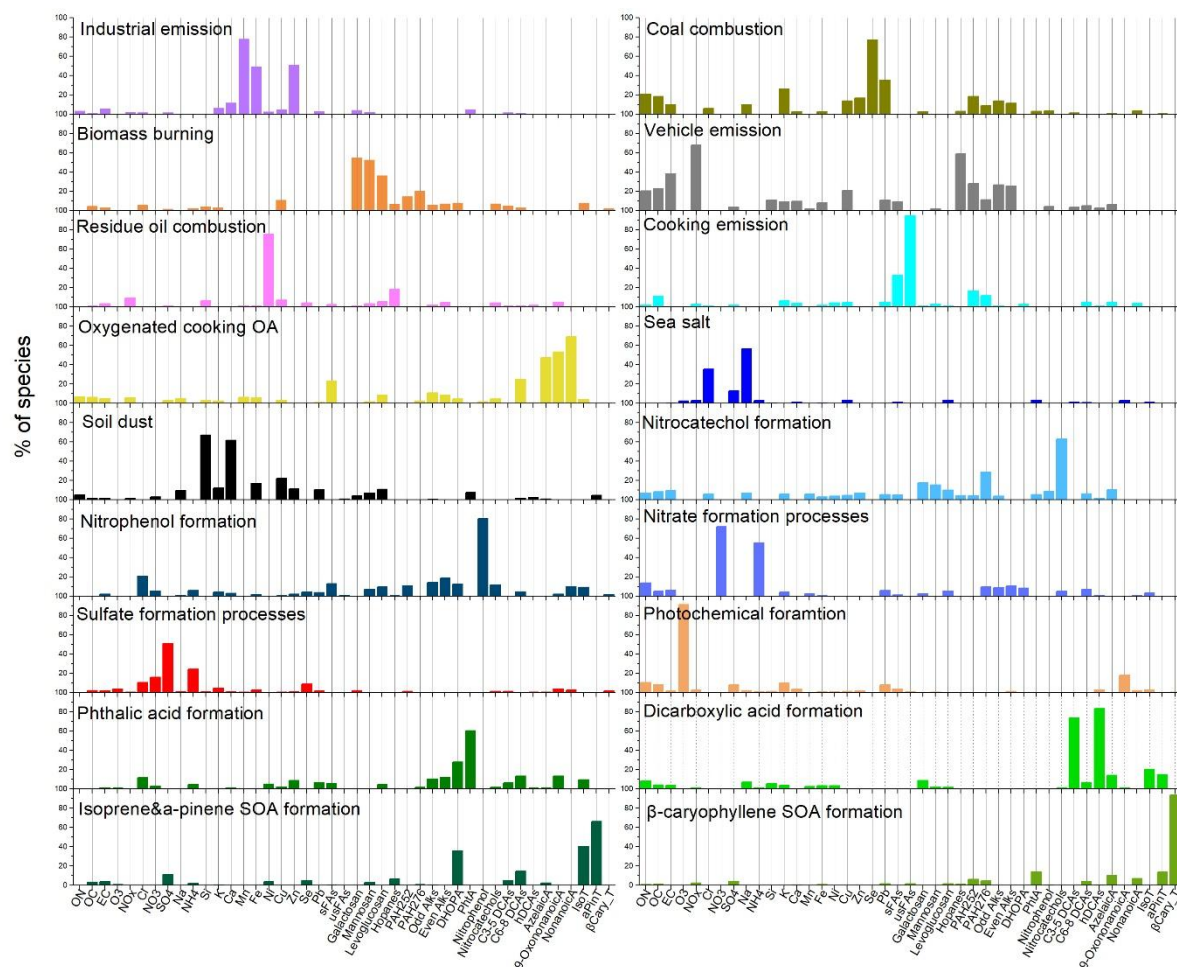

**Figure S3.** Source profiles for the 18-factor solution from PMF analysis. Detailed descriptions of organic species can be found in Table S1.

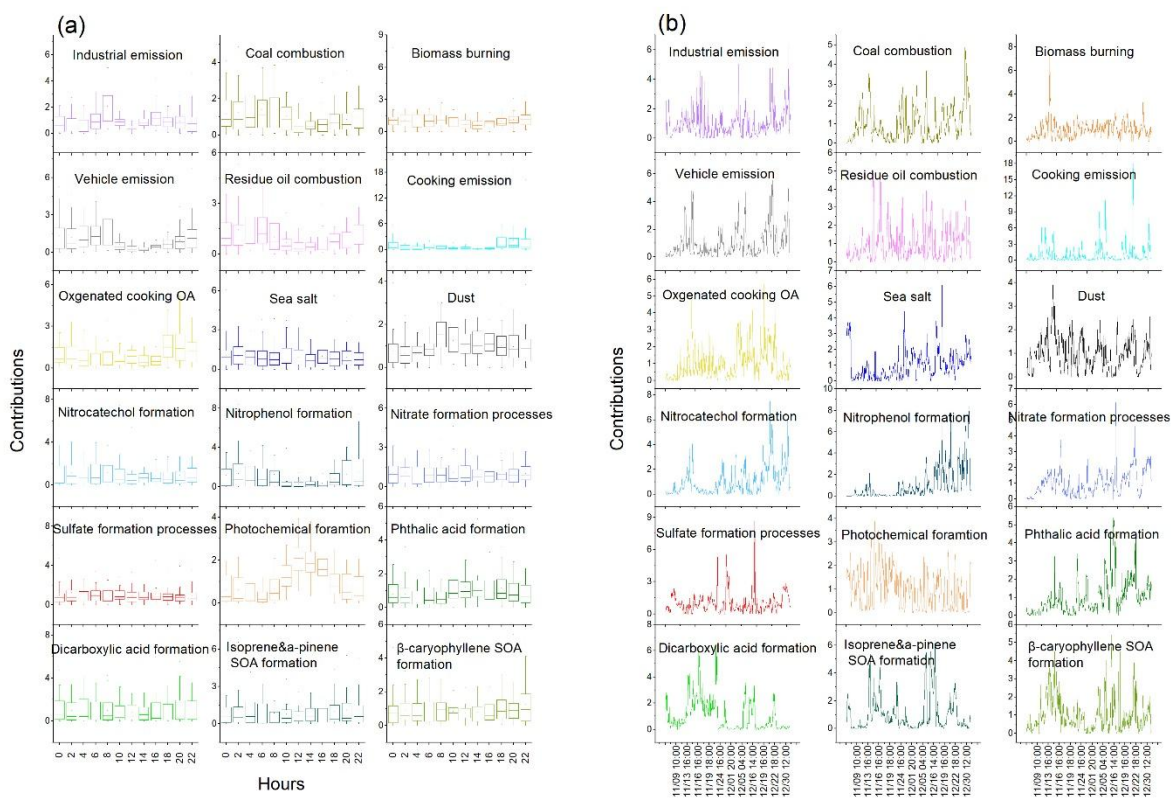

**Figure S4.** Diel variation patterns (a) and time series (b) of source contributions for the 18 factor-PMF solution.

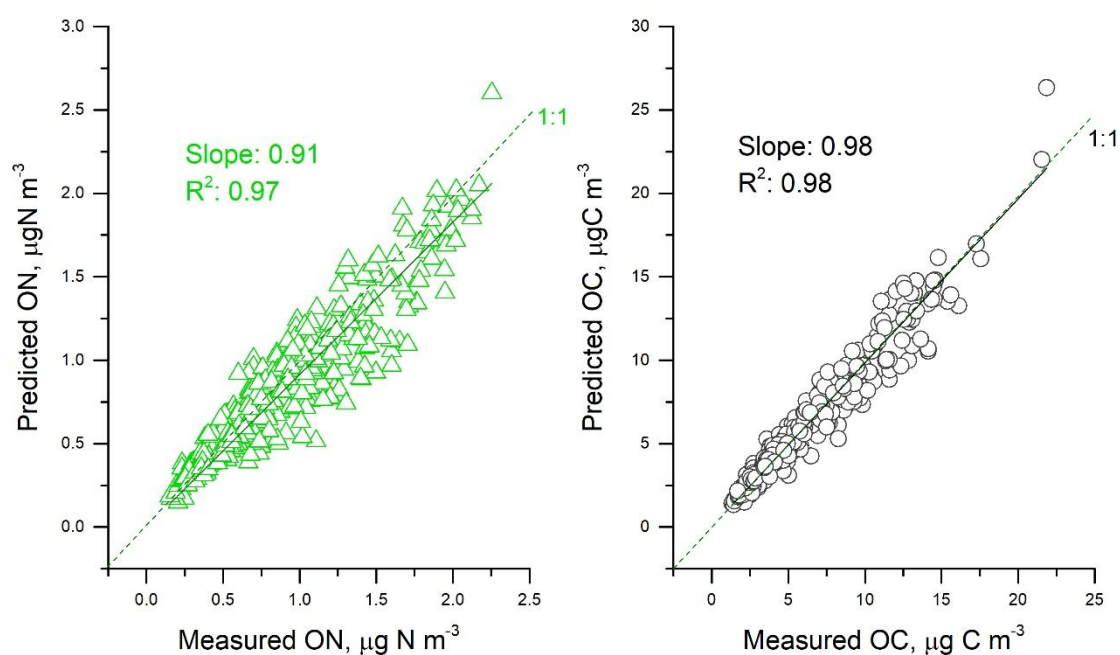

**Figure S5.** Comparisons between measured and PMF-predicted ON and OC concentrations.

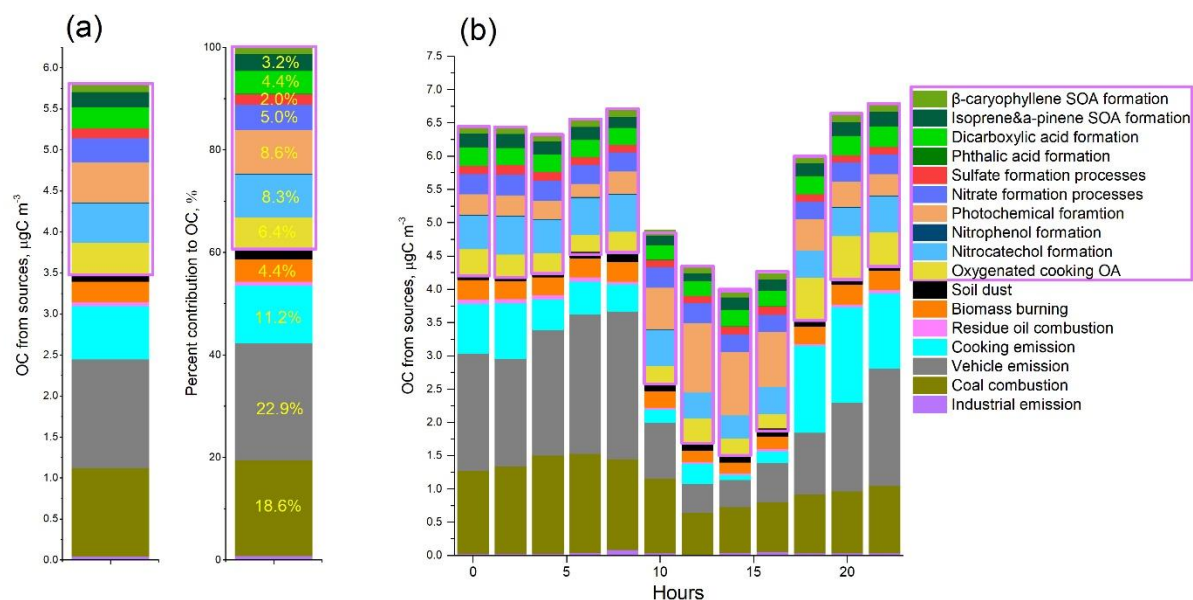

**Figure S6.** Source apportionment results for aerosol OC by PMF analysis. (a) Overall mass and percent contributions of resolved sources to OC. Numerical results of percent contribution to OC from industrial emission (0.8%), residual oil combustion (0.8%), soil dust (2%), nitrophenol formation (0.2%), phthalic acid formation (0.04%), and β-caryophyllene SOA formation (1%) are very low and not shown. (b) Diel patterns of mass contributions of each source to OC. Secondary sources of OC are highlighted with a purple box. The source compositions of ON can be found in the main text in Figure 2.



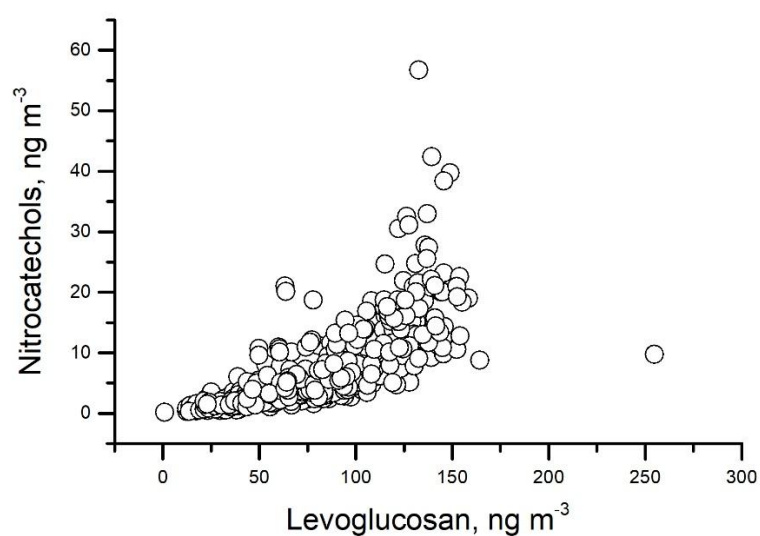

**Figure S7.** Relationship between levoglucosan and nitrocatechols. Nitrocatechols represent the summation of 4-nitrocatechol, 3-Methyl-5-Nitrocatechol, 4-Methyl-5-Nitrocatechol.

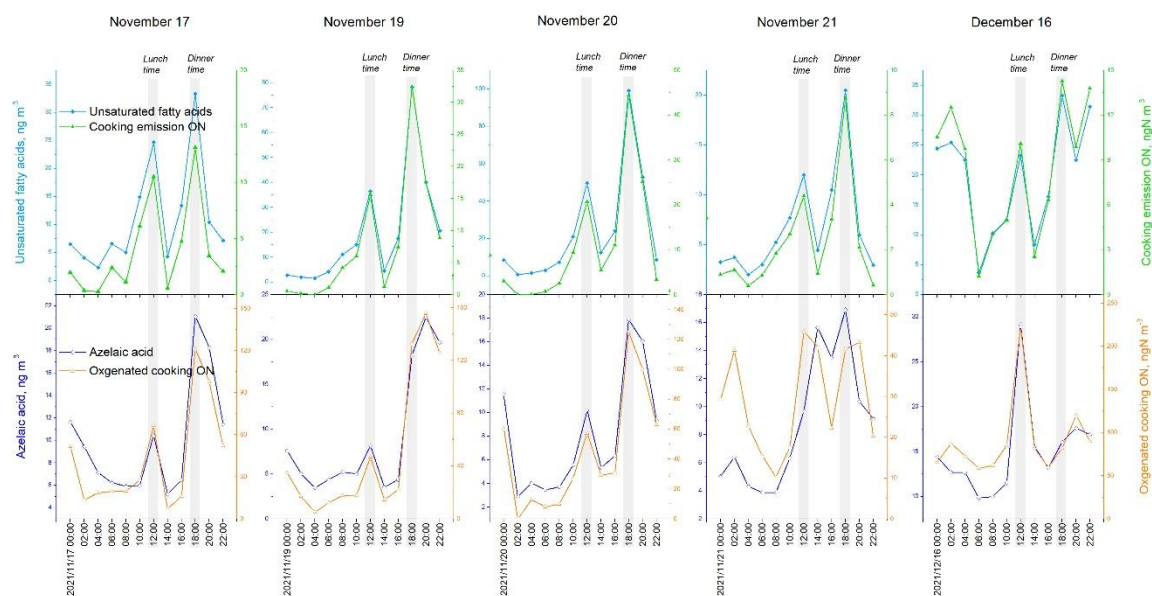

**Figure S8.** Five representative cases in which the concentrations of cooking emission tracers (unsaturated fatty acids) and oxygenated cooking OA (Azelaic acid) and their associated ON were peaked both at lunchtime and dinnertime.

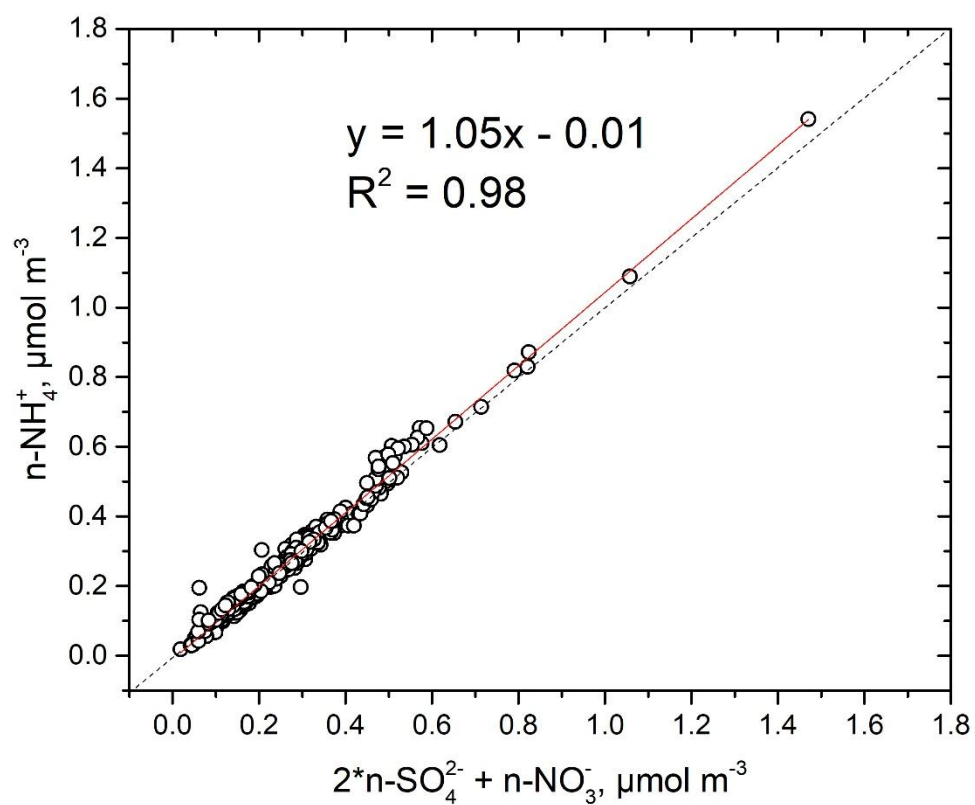

**Figure S9.** Charge balance between ammonium, sulfate and nitrate during the observation.

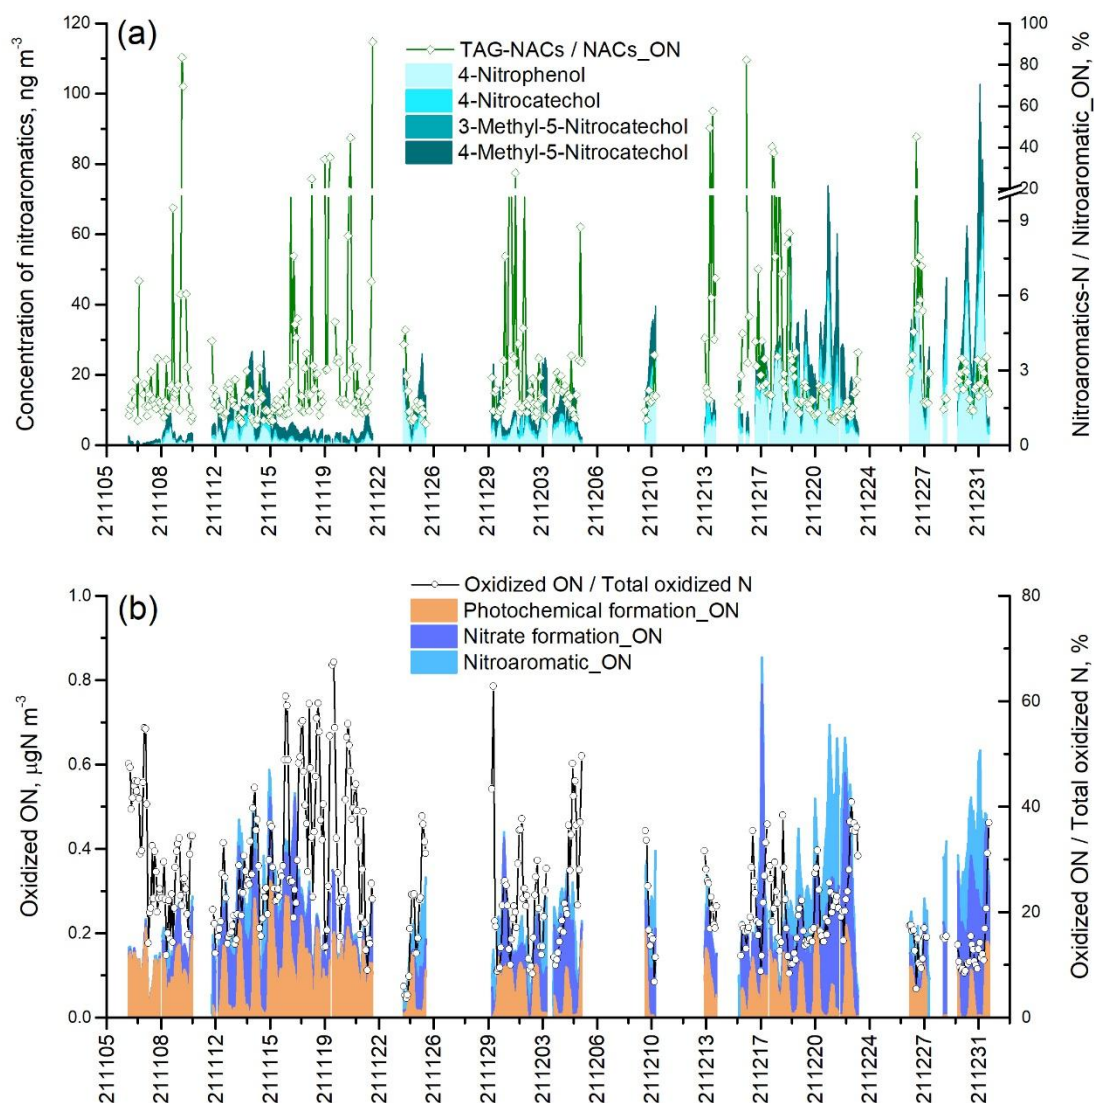

**Figure S10.** (a) Concentrations of the four nitroaromatic compounds determined by TAG system and the ratio of nitroaromatics-N over the nitroaromatic\_ON. The nitroaromatics-N is the summation of N in the four individual nitroaromatic compounds determined by TAG system, and the nitroaromatic\_ON is ON mass that distributed in nitrophenol and nitrocatechol formation factors in the PMF analysis. (b) Concentrations of ON fractions associated with photochemical formation, nitrate formation, and nitroaromatic formation processes resolved from the PMF analysis. The ratio of oxidized ON over total oxidized N is also shown. The oxidized ON is the summation of ON fractions associated with photochemical formation, nitrate formation, and nitroaromatic formation processes, while the total oxidized N is the summation of oxidized ON and inorganic nitrate-N.

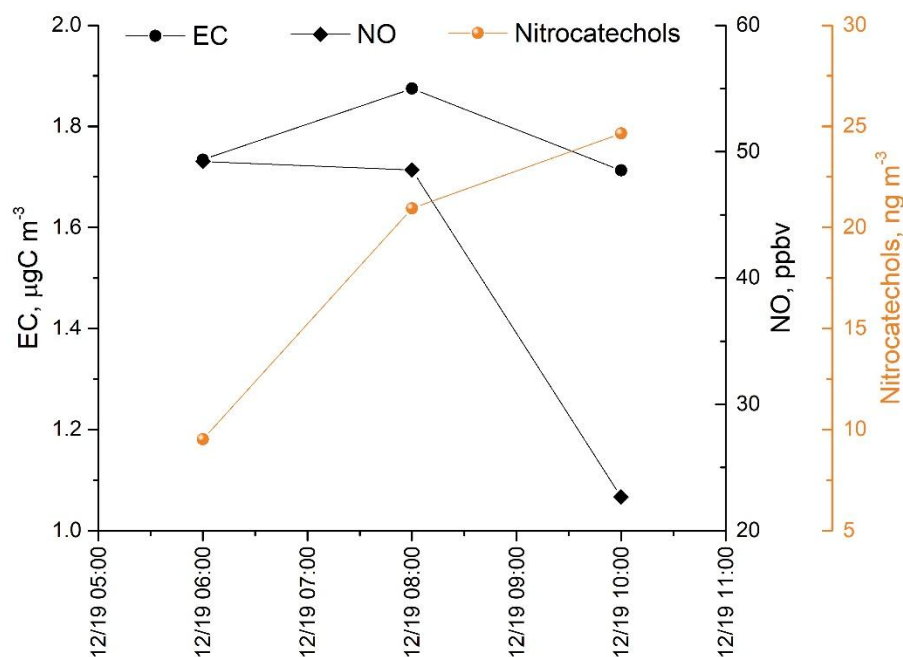

**Figure S11.** Variations of the concentrations of elemental carbon (EC), nitric oxide (NO), and nitrocatechols during the Type 4 case shown in Figure 4 in the main text.

## References

- Wang, Q. Q., Huang, X. H. H., Zhang, T., Zhang, Q. Y., Feng, Y. M., Yuan, Z. B., Wu, D., Lau, A. K. H., and Yu, J. Z.: Organic tracer-based source analysis of  $\text{PM}_{2.5}$  organic and elemental carbon: A case study at Dongguan in the Pearl River Delta, China, *Atmos. Environ.*, 118, 164-175, 2015.
- Wang, Q. Q., Qiao, L. P., Zhou, M., Zhu, S. H., Griffith, S., Li, L., and Yu, J. Z.: Source Apportionment of  $\text{PM}_{2.5}$  Using Hourly Measurements of Elemental Tracers and Major Constituents in an Urban Environment: Investigation of Time-Resolution Influence, *J. Geophys. Res. Atmos.*, 123, 5284–5300, 2018.
